# Supplementary material for: Comparative Genomics of Cluster O Mycobacteriophages
Source: PubMed Central journal article supplement (PMC4351075; doi:10.1371/journal.pone.0118725), 2015-03-05
Supplement: pone.0118725.s001.pdf [file pone.0118725.s001.pdf]

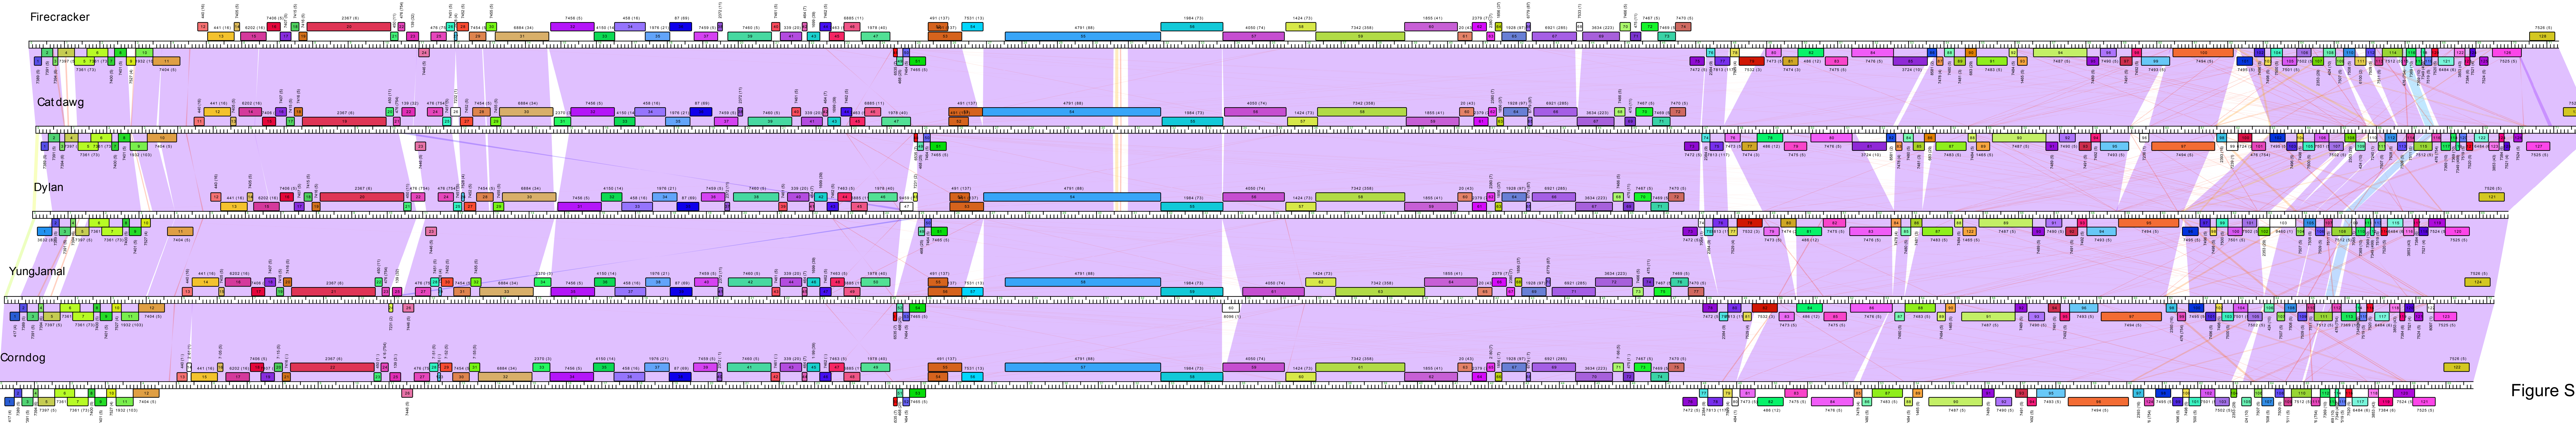

Figure S1
